# Supplementary material
Source: PubMed Central journal article supplement (PMC5156960)
Supplement: ct6b00841_si_001.pdf [file ct6b00841_si_001.pdf]

# SUPPLEMENTARY INFORMATION

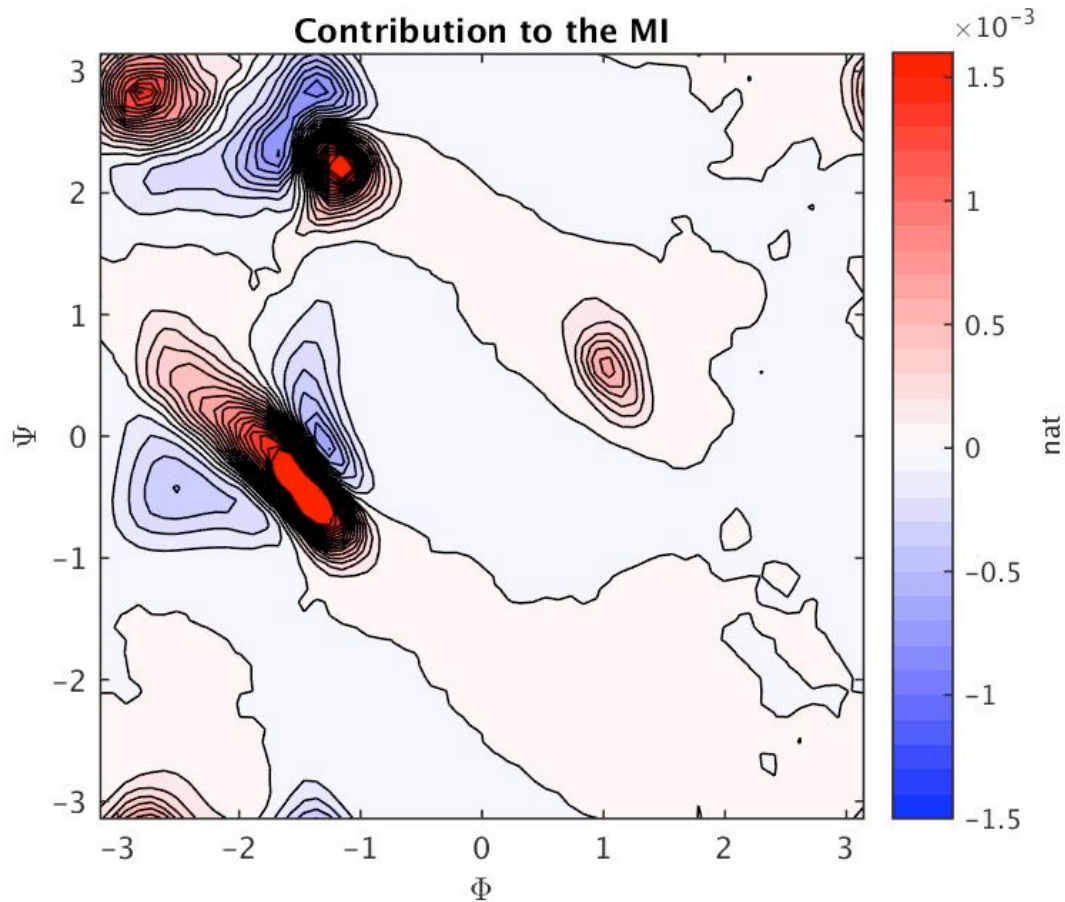

**Figure S1: The contribution of each bin of  $(\Phi, \Psi)$  space to the mutual information.** Regions of high thermodynamic coupling do not contribute significantly to the mutual information. Units are shown in nats.

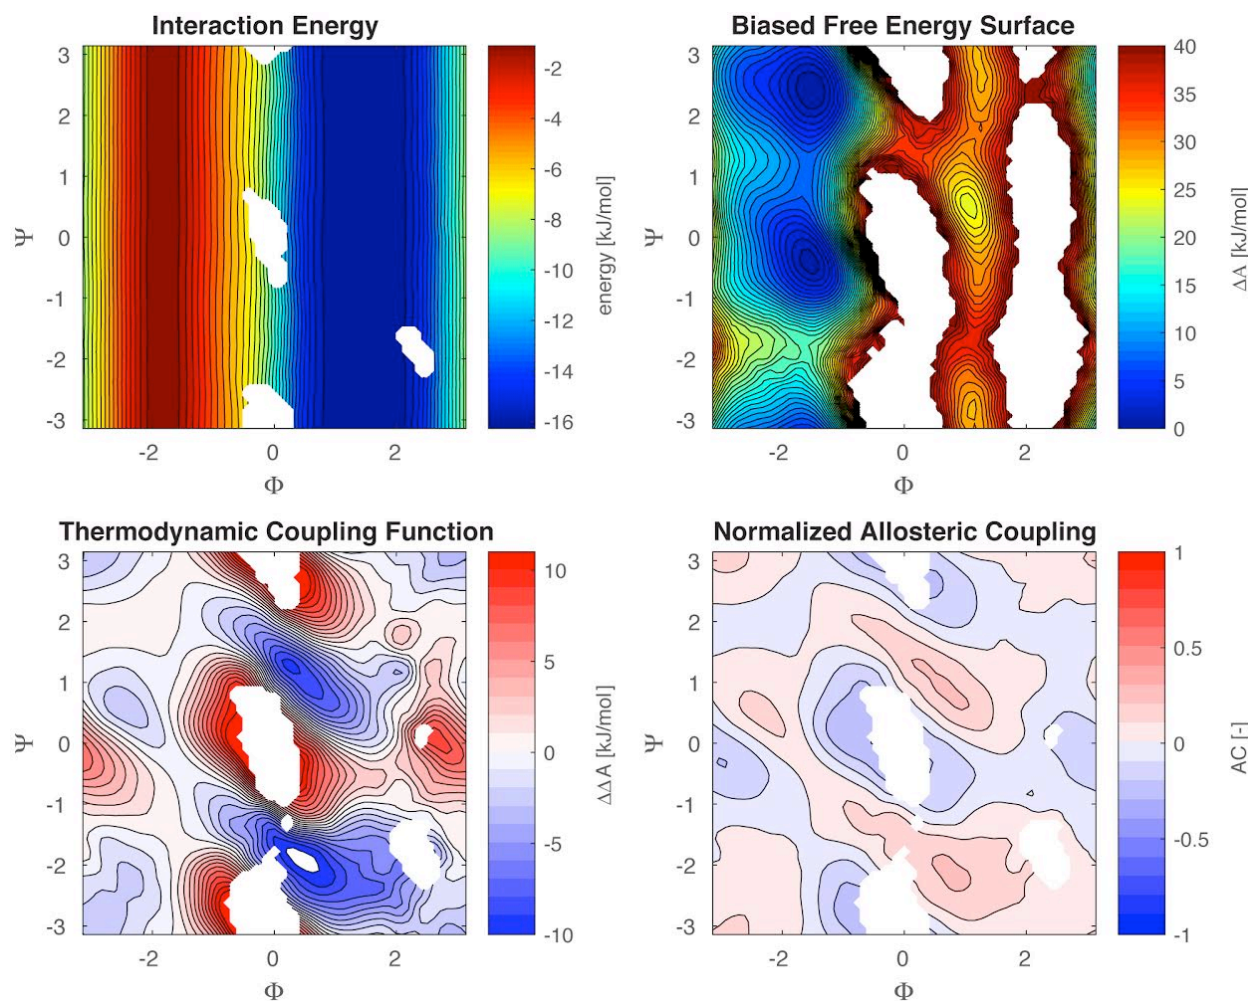

**Figure S2: Biasing approach to characterize the contribution of the  $\Phi$  dihedral energy term to the allosteric coupling function of the alanine dipeptide.** (a) Average interaction energy in bins of the  $(\Phi, \Psi)$  space. (b) The biased free energy surface according to Eq. (28). (c) The biased thermodynamic coupling function, according to Eq. (30). (d) AC corresponding to the biased allosteric function.

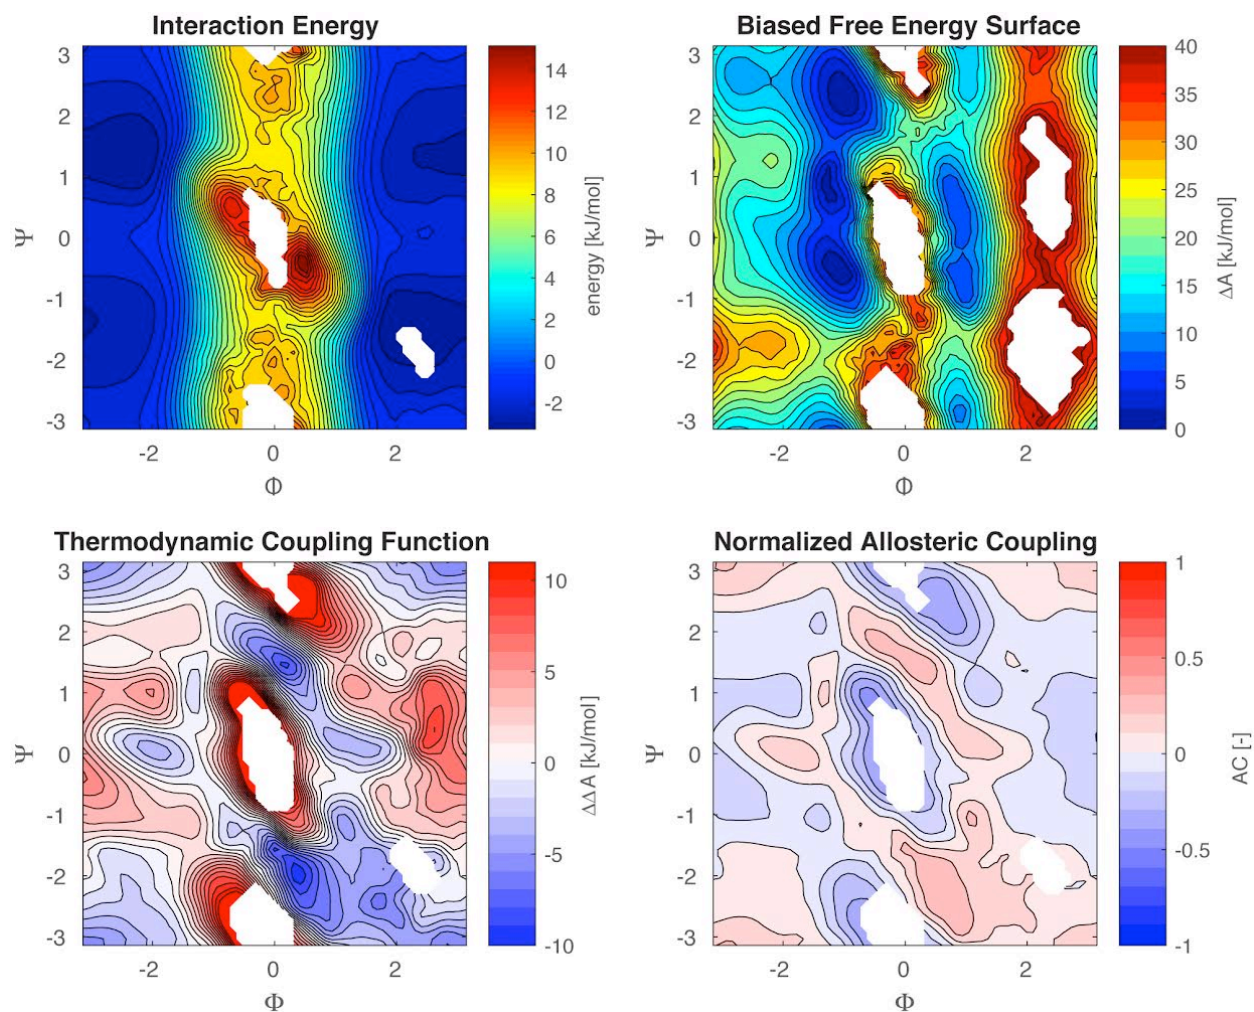

**Figure S3: Biasing approach to characterize the contribution of the direct non-bonded interaction energy terms between the N-terminus and the C-terminus of the alanine dipeptide.** (a) Average interaction energy in bins of the  $(\Phi, \Psi)$  space. (b) The biased free energy surface according to Eq. (28). (c) The biased thermodynamic coupling function, according to Eq. (30). (d) AC corresponding to the biased allosteric function.

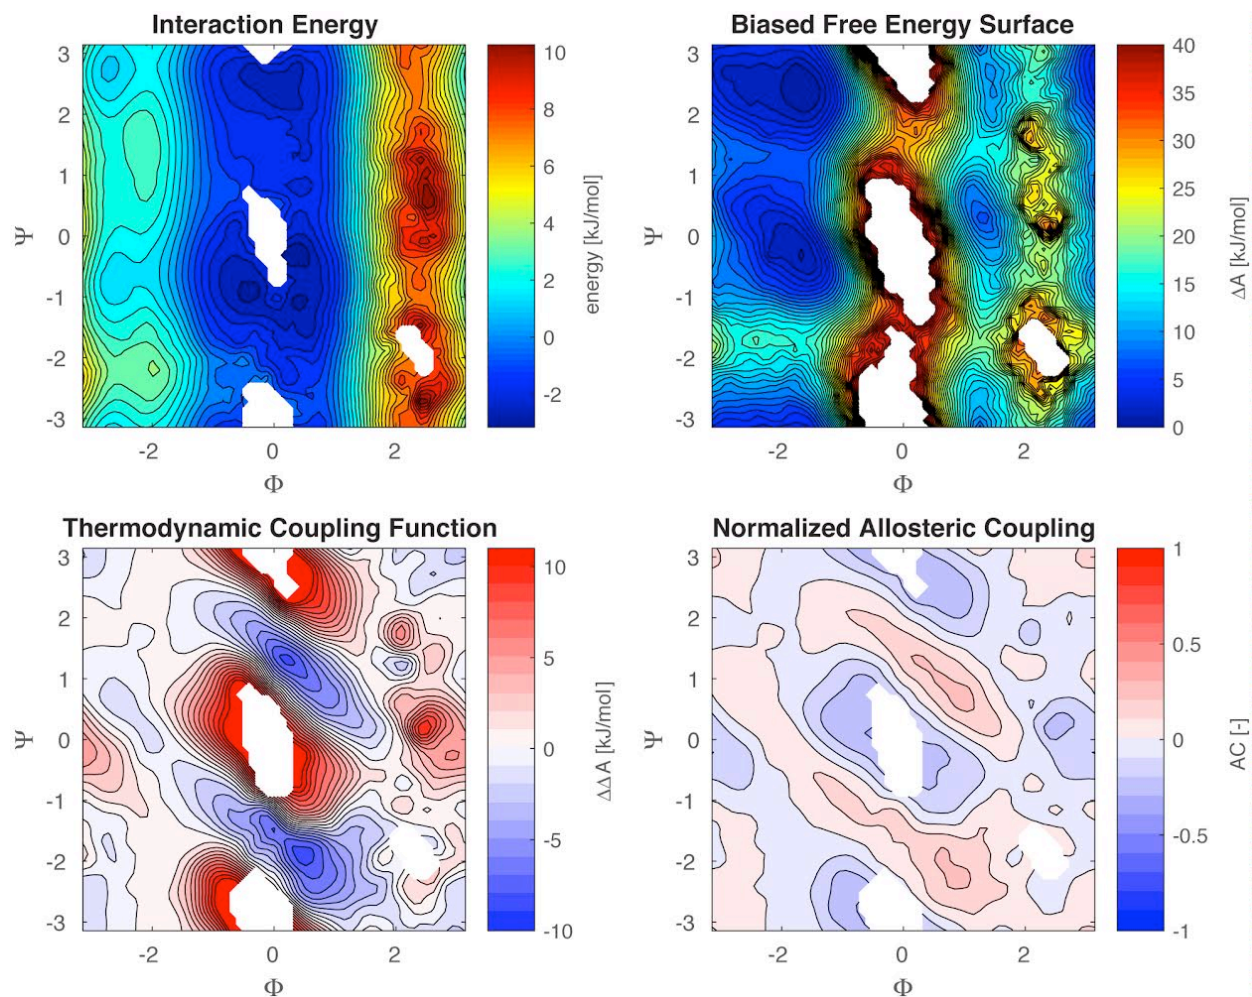

**Figure S4: Biasing approach to characterize the contribution of the non-bonded interaction energy terms between the N-terminus and the channel, and between the C-terminus and the channel of the alanine dipeptide.** (a) Average interaction energy in bins of the  $(\Phi, \Psi)$  space. (b) The biased free energy surface according to Eq. (28). (c) The biased thermodynamic coupling function, according to Eq. (30). (d) AC corresponding to the biased allosteric function.

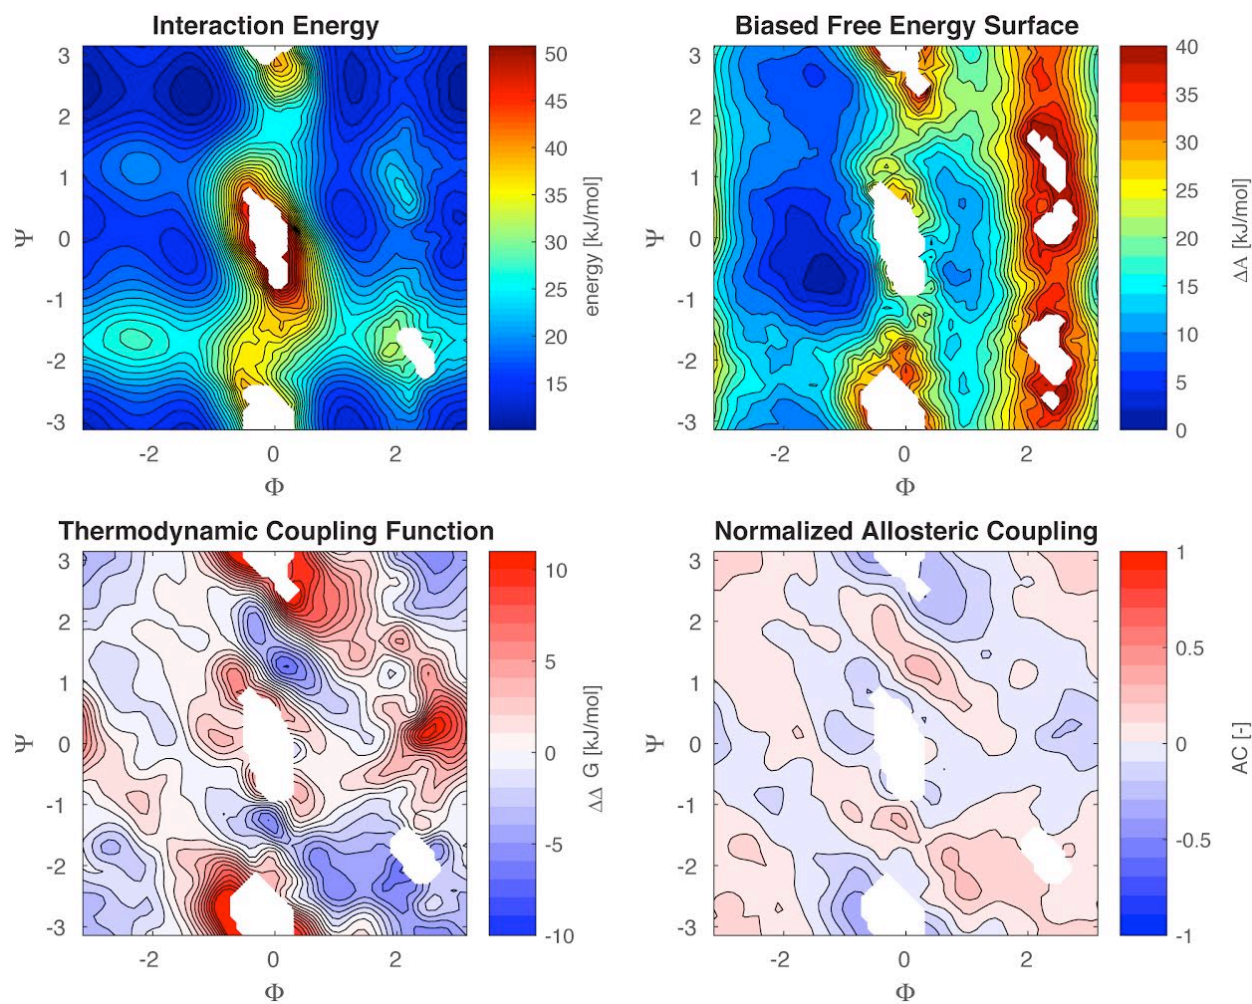

**Figure S5: Biasing approach to characterize the contribution of the bonded interaction energy terms involving atoms of the channel and of either the N-terminus or the C-terminus of the alanine dipeptide.** (a) Average interaction energy in bins of the  $(\Phi, \Psi)$  space. (b) The biased free energy surface according to Eq. (28). (c) The biased thermodynamic coupling function, according to Eq. (30). (d) AC corresponding to the biased allosteric function.
